# Supplementary material for: Heterogeneous non-canonical nucleosomes predominate in yeast cells in situ
Source: eLife. 2023 Jul 28;12:RP87672. doi: 10.7554/eLife.87672 (PMC10382156; doi:10.7554/eLife.87672)
Supplement: Supplementary file 1. [file elife-87672-supp1.xlsx]

## Sheet: Sheet1
Supplementary file 1. Genotypes of strains used in this paper
Strain	Parent	Genotype	Source
BY4741	--	MATa his3D1 leu2Δ0 met15Δ0 ura3Δ0	EUROSCARF
LGY0012	BY4741	(hta2-htb2)Δ0::KANMX	This paper
LGY0015	BY4741	HTB1-GFP(S65T)(0aa linker)-HIS3MX	This paper
LGY0016	LGY0012	(hta2-htb2)Δ0::KANMX HTA1-GFP(S65T)(0aa linker)-HIS3MX	This paper
LGY0002	BY4741	HHT1-GFP(S65T)(RIPGLIN linker)-HIS3MX	This paper
LGY0007	BY4741	HHT1-GFP(S65T)(0aa linker)-HIS3MX	This paper
LGY0070	BY4741	HHT1-GFP(S65T)(GGSGGS linker)-HIS3MX	This paper
LGY0071	BY4741	HHF1-GFP(S65T)(GGSGGS linker)-HIS3MX	This paper
