# Supplementary material for: Heterogeneous non-canonical nucleosomes predominate in yeast cells in situ
Source: eLife. 2023 Jul 28;12:RP87672. doi: 10.7554/eLife.87672 (PMC10382156; doi:10.7554/eLife.87672)
Supplement: Supplementary file 2. — All primers are listed in the direction 5’ → 3’. [file elife-87672-supp2.xlsx]

## Sheet: Sheet1
Supplementary file 2. PCR primers, 5’ → 3’
Editing
HTA1-GFP Tag F	AAAGAAGTCTGCCAAGGCTACCAAGGCTTCTCAAGAATTAAGTAAAGGAGAAGAACTTTT
HTA1-GFP Tag R	TTTAGTTCCTTCCGCCTTCTTTAAAATACCAGAACCGATCGAATTCGAGCTCGTTTAAAC
HTB1-GFP Tag F	TACTAGAGCTGTTACCAAGTACTCTTCCTCTACTCAAGCAAGTAAAGGAGAAGAACTTTT
HTB1-GFP Tag R	TAAATAATAATATTAATTATAACCAAAGGAAGTGATTTCAGAATTCGAGCTCGTTTAAAC
HAB2 Del F	AAGAATGTTTGATTTGCTTTGTTTCTTTTCAACTCAGTTCCAGATCCGCTAGGGATAACA
HAB2 Del R	AAAAGAAAACATGACTAAATCACAATACCTAGTGAGTGACTCGATGAATTCGAGCTCG
HHT1-RIPGLIN-GFP Tag F	GGATATCAAGTTGGCTAGAAGATTAAGAGGTGAAAGATCACGGATCCCCGGGTTAATTAA
HHT1-GFP Tag F	GGATATCAAGTTGGCTAGAAGATTAAGAGGTGAAAGATCAAGTAAAGGAGAAGAACTTTT
HHT1-GFP Tag R	TTTTGTTCGTTTTTTACTAAAACTGATGACAATCAACAAAGAATTCGAGCTCGTTTAAAC
HHT1-GGSGGS-GFP Tag F	TCCAAAAGAAGGATATCAAGTTGGCTAGAAGATTAAGAGGTGAAAGATCAGGTGGATCTGGTGGATCTAGTAAAGGAGAAGAACTTTT
HHT1-GFP Tag R (Long)	TTTATTGTGTTTTTGTTCGTTTTTTACTAAAACTGATGACAATCAACAAAGAATTCGAGCTCGTTTAAAC
HHF1-GGSGGS-GFP Tag F	TTGTTTATGCTTTGAAGAGACAAGGTAGAACCTTATACGGTTTCGGTGGTGGTGGATCTGGTGGATCTAGTAAAGGAGAAGAACTTTT
HHF1-GFP Tag R	CGAATCCCAAATATTTGCTTGTTGTTACCGTTTTCTTAGAATTAGCTAAAGAATTCGAGCTCGTTTAAAC
Confirmation
FA1	CGGTGGTAAAGGTGGTAAAG
RA1	TCGTTTCTGATAAACCAGGT
RG	CCGTTTCATATGATCTGGGT
FH	GACCATTTGCTGTAATCGAC
RK	CCTTATTTTTGACGAGGGGA
RB2	ATTAACCGGGATTCACTGAC
RA2	CAGTTCTTGAGAAGCTTTGG
RA2.2	CTGGACGAAGACGAAGTAAT
FB1	ATGTCTGCTAAAGCCGAAAA
RB1	AGTCAGCGACATCTGTCTTT
FT1	AAGCAAACAGCAAGAAAGTC
RT1	CTTCTGACAGCAAGGGTATT
FF1	ATGTCCGGTAGAGGTAAAGG
RF1	ACACACGAAAATCCTGTGAT
Sequencing
FA1	CGGTGGTAAAGGTGGTAAAG
RA1	TCGTTTCTGATAAACCAGGT
RG	CCGTTTCATATGATCTGGGT
Histone-GFP Seq R1.2	CTGACCTACAGGAAAGAGTT
Histone-GFP Seq F2.1	CTGTCCTTTTACCAGACAAC
Histone-GFP Seq F2.2	CTCTTATTGACCACACCTCT
Histone-GFP Seq R2.2	CTTCTTTGCAGGAAGAATCG
Histone-GFP Seq F3.1	TCACATCACATCCGAACATA
FH	GACCATTTGCTGTAATCGAC
RA2.2	CTGGACGAAGACGAAGTAAT
HAB2Del Seq R1	ATTACCCTGTTATCCCTAGC
HAB2Del Seq R2	CAGGAGTACGGATAAAATGC
HAB2Del Seq R3	TATCGAATCGACAGCAGTAT
RK	CCTTATTTTTGACGAGGGGA
RB2	ATTAACCGGGATTCACTGAC
FB1	ATGTCTGCTAAAGCCGAAAA
RB1	AGTCAGCGACATCTGTCTTT
FT1	AAGCAAACAGCAAGAAAGTC
RT1	CTTCTGACAGCAAGGGTATT
FF1	ATGTCCGGTAGAGGTAAAGG
RF1	ACACACGAAAATCCTGTGAT
