# Supplementary material for: Heterogeneous non-canonical nucleosomes predominate in yeast cells in situ
Source: eLife. 2023 Jul 28;12:RP87672. doi: 10.7554/eLife.87672 (PMC10382156; doi:10.7554/eLife.87672)
Supplement: Supplementary file 3. — CST = Cell Signaling Technology. [file elife-87672-supp3.xlsx]

## Sheet: Sheet1
Supplementary file 3. Antibodies for immunoblots
Antigen	1º antibody	2º antibody	Dilution
			1º	2º
H2A	Active Motif 39235	CST 7074S	1:1000	1:5000
H2B	Abcam ab1790	CST 7074S	1:1000	1:5000
H3	Abcam ab1791	CST 7074S	1:1000	1:5000
H4	Abcam ab10158	CST 7074S	1:1000	1:5000
GFP	Santa Cruz sc9996	CST 7076S	1:1000	1:5000
CST = Cell Signaling Technology
